# Supplementary material for: A copper(ii) metal–organic framework with 2,2-dimethylglutarate and imidazole ligands: synthesis, characterization and catalytic performance for cycloaddition of CO2 to epoxides
Source: Royal Society of Chemistry journal article supplement (doi:10.1039/d3nj04256a), 2023-12-19
Supplement: d3nj04256a1.pdf [file d3nj04256a1.pdf]

## Electronic Supplementary Information

**Copper(II) Metal-Organic Framework with 2,2-Dimethylglutarate and Imidazole Ligands: Synthesis, Characterization and catalytic performance for cycloaddition of CO<sub>2</sub> to epoxides**

**Pelin Köse Yaman<sup>a,b\*</sup>, Sevde Demir<sup>a</sup>, Serpil Denizaltı<sup>c</sup>, Hakan Erer<sup>a</sup> and Okan Zafer**

**Yeşilel<sup>a</sup>**

<sup>a</sup>Dokuz Eylül University, Faculty of Science, Department of Chemistry, 35390, Izmir, Türkiye

<sup>b</sup>Eskişehir Osmangazi University, Faculty of Science, Department of Chemistry, 26040, Eskişehir, Türkiye

<sup>c</sup>Ege University, Faculty of Science, Department of Chemistry, 35100, Izmir, Türkiye

\*Corresponding author. Fax: +90 2324534188.

E-mail address: [pelin.kose@deu.edu.tr](mailto:pelin.kose@deu.edu.tr) (P. Köse Yaman).

## Table of contents

|                                                                                      |    |
|--------------------------------------------------------------------------------------|----|
| Section 1. Additional Structural Analysis.....                                       | 2  |
| <b>Fig. S1.</b> FTIR spectrum of 2,2-dimethylglutaric acid (dmgH <sub>2</sub> )..... | 2  |
| <b>Fig. S2.</b> FT-IR Spectrum of <b>1</b> .....                                     | 3  |
| Section 2. Powder X-ray Diffraction (PXRD) Patterns .....                            | 3  |
| <b>Fig. S3.</b> Experimental and calculated PXRD patterns of <b>1</b> .....          | 3  |
| Section 3. Thermal analysis and Optical Absorption Results.....                      | 5  |
| <b>Fig. S5.</b> UV-Vis spectra of <b>1</b> .....                                     | 6  |
| <b>Fig. S6.</b> The Kubelka-Munk plot as a function of energy for <b>1</b> .....     | 6  |
| Section 4. Additional Crystallographic Parameters .....                              | 8  |
| <b>Table S1.</b> Selected bond distances and angles for <b>1</b> (Å, °).....         | 8  |
| <b>Table S2.</b> Hydrogen-bond geometry (Å, °) for <b>1</b> .....                    | 8  |
| Section 4. <sup>1</sup> H NMR Data From The Catalytic Reaction Results .....         | 9  |
| <b>Fig. S7.</b> The Catalytic Reaction Result of Entry 1 .....                       | 9  |
| <b>Fig. S8.</b> The Catalytic Reaction Result of Entry 4 .....                       | 9  |
| <b>Fig. S9.</b> The Catalytic Reaction Result of Entry 5 .....                       | 10 |
| <b>Fig. S10.</b> The Catalytic Reaction Result of Entry 6 .....                      | 10 |
| <b>Fig. S11.</b> The Catalytic Reaction Result of Entry 9 .....                      | 11 |
| <b>Fig. S12.</b> The Catalytic Reaction Result of Entry 10 .....                     | 11 |
| <b>Fig. S13.</b> The Catalytic Reaction Result of Entry 11 .....                     | 12 |
| <b>Fig. S14.</b> The Catalytic Reaction Result of Entry 12 .....                     | 12 |
| <b>Fig. S15.</b> The Catalytic Reaction Result of Entry 13 .....                     | 13 |
| Section 5. References.....                                                           | 13 |

## Section 1. Additional Structural Analysis

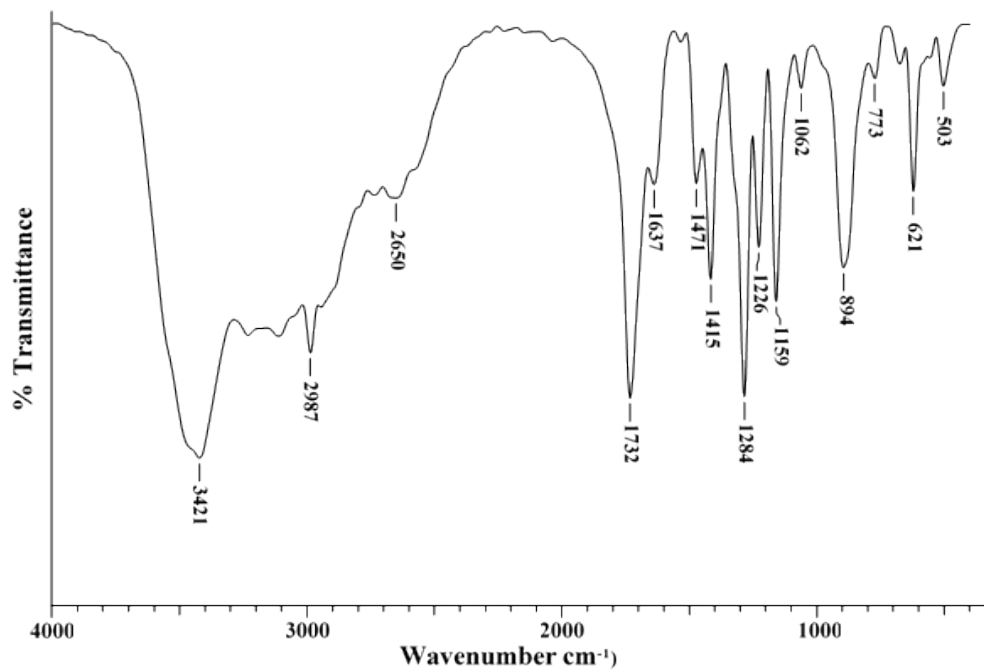

**Fig. S1.** FTIR spectrum of 2,2-dimethylglutaric acid (dmgH<sub>2</sub>)

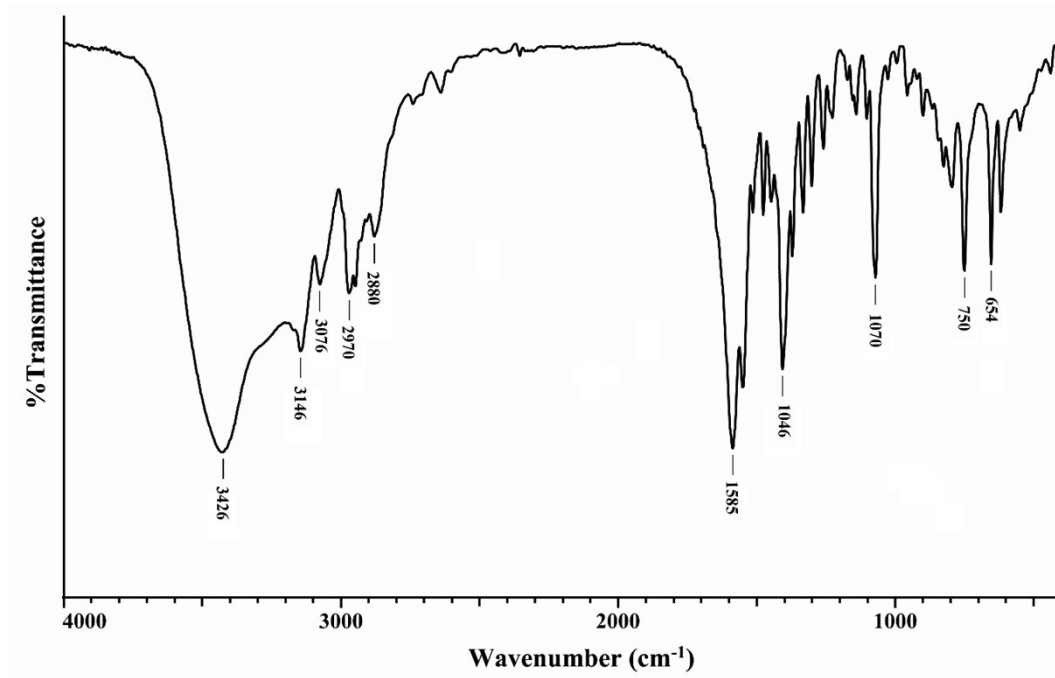

**Fig. S2.** FT-IR Spectrum of 1

## Section 2. Powder X-ray Diffraction (PXRD) Patterns

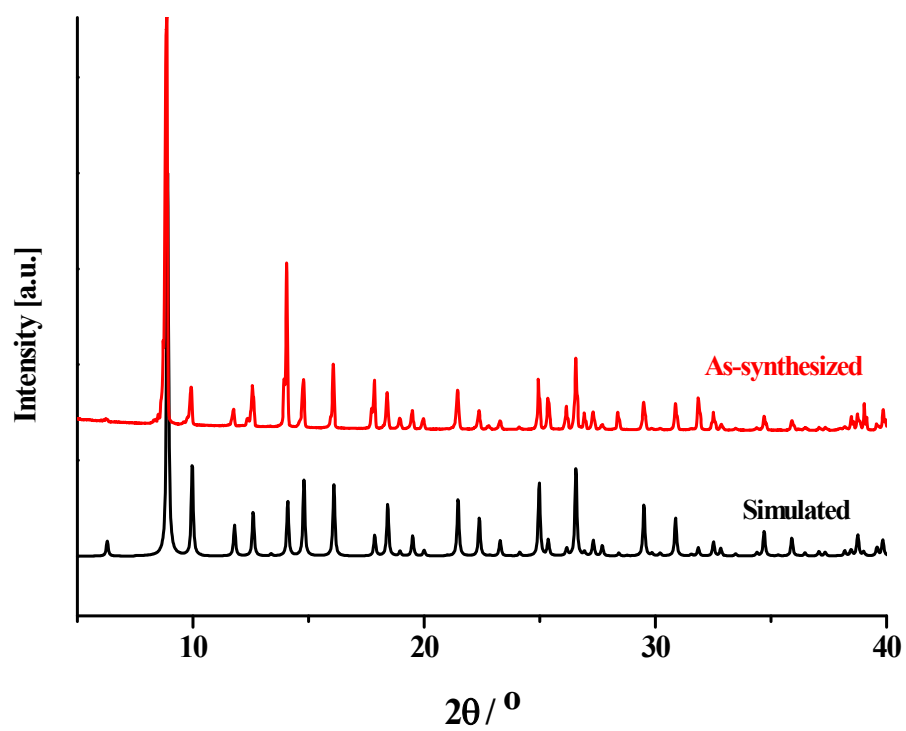

**Fig. S3.** Experimental and calculated PXRD patterns of **1**

### Section 3. Thermal analysis and Optical Absorption Results

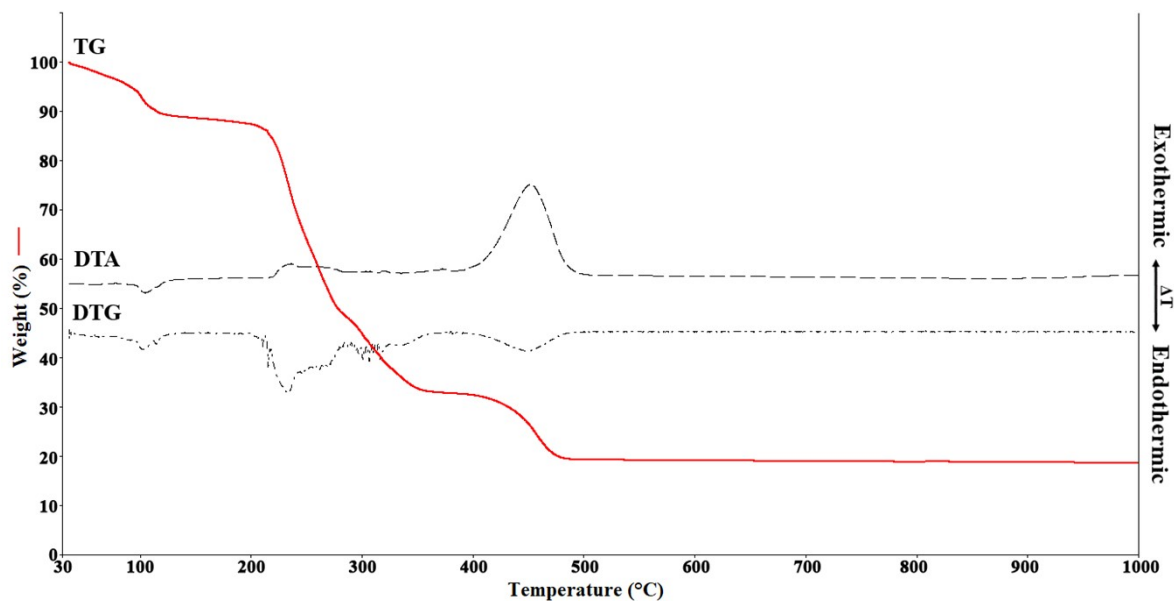

**Fig. S4.** The thermal analysis curves (TG, DTG and DTA) of **1**

Thermal properties of **1** were determined by simultaneous TG/DTA analysis (Fig. S4). The compound **1** shows a two-stage decomposition process. In the first step, **1** started to lose crystal water molecule in the range of 48–138 °C with an experimental mass loss of 12 % (calc. 13 %). The second stage of the temperature range of 189–506 °C for **1** is related to the decomposition of im and dmg ligands by exothermic effect ( $DTA_{max.} = 452$  °C). The final product of thermal decomposition was also identified as a CuO by IR spectroscopy (exp.:19.25, calc.:19.17%).

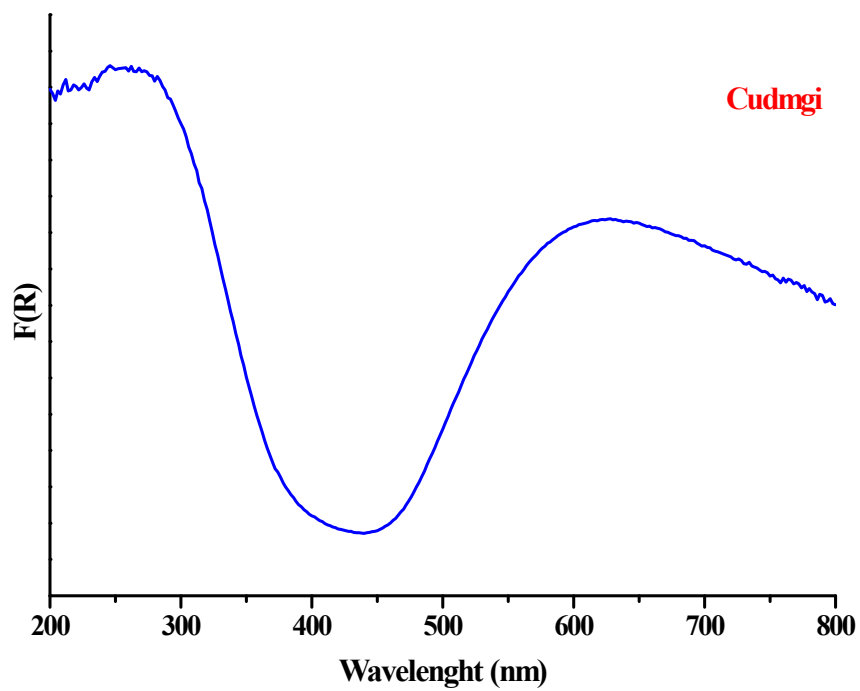

Fig. S5. UV-Vis spectra of **1**

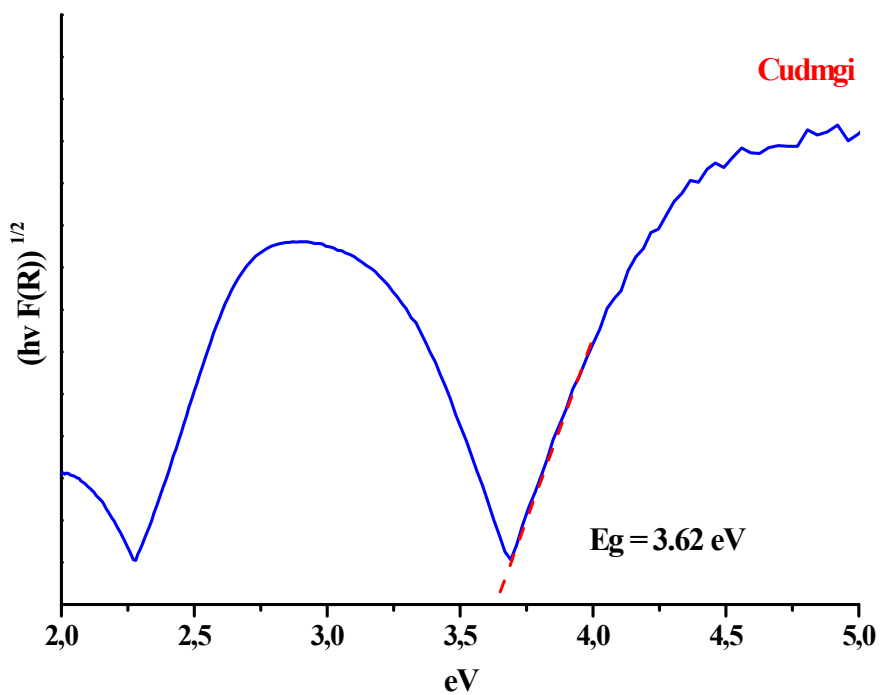

Fig. S6. The Kubelka-Munk plot as a function of energy for **1**

The optical band gaps ( $E_g$ ) and semiconductor properties of **1** were investigated using solid state diffuse reflection spectrum at room temperature ( $\text{BaSO}_4$  was used as reference material for measurements). Because of the data obtained, the calculated optical band gap ( $E_g$ ) value of the complex and the Kubelka-Munk curves were plotted as a function of energy (Fig. S5). The equation  $[(F(R) = (1-R)^2/2R)]$ , known as the Kubelka-Munk function, was used to determine the optical band gap value. By converting the data obtained from the reflection spectrum into absorption data, the photon energy versus  $h\nu(F(R))^{1/2}$  [ $F(R)$ ; Kubelka–Munk function] curve was drawn and by extrapolating from the linear part of this curve, the optical band gap value of the complex was found ( $E_g = 3.62$  eV). According to these results, the complex shows semi-conductor properties (optical band gaps of structures  $E_g < 4$  eV show semiconductor properties) [1,2].

## Section 4. Additional Crystallographic Parameters

**Table S1.** Selected bond distances and angles for **1** (Å, °)

| <b>Complex 1</b>       |             |                        |             |
|------------------------|-------------|------------------------|-------------|
| Cu1–O1                 | 2.002 (3)   | Cu1–N3                 | 1.973 (3)   |
| Cu1–O3 <sup>i</sup>    | 2.020 (3)   | Cu1–N1                 | 1.983 (3)   |
| O1–Cu1–O3 <sup>i</sup> | 177.12 (11) | N3–Cu1–N1              | 175.38 (14) |
| N3–Cu1–O1              | 92.21 (12)  | N1–Cu1–O1              | 92.06 (13)  |
| N3–Cu1–O3 <sup>i</sup> | 88.47 (12)  | N1–Cu1–O3 <sup>i</sup> | 87.35 (13)  |

**Symmetry codes:** (i)  $-y+5/4, x-1/4, z-1/4$ ; (ii)  $y+1/4, -x+5/4, z+1/4$ ; (iii)  $y+1/4, -x+3/4, -z+3/4$ ; (iv)  $-y+5/4, x-1/4, z+3/4$ ; (v)  $-y+1/2, -x+3/2, -z+3/2$ .

**Table S2.** Hydrogen-bond geometry (Å, °) for **1**

| <b>D–H···A</b>            | <b>D–H</b> | <b>H···A</b> | <b>D···A</b> | <b>D–H···A</b> |
|---------------------------|------------|--------------|--------------|----------------|
| N4–H4···O4 <sup>iii</sup> | 0.86       | 1.92         | 2.765 (4)    | 167            |
| N2–H2···O5 <sup>iv</sup>  | 0.86       | 2.17         | 2.909 (7)    | 144            |
| O5–H5E···O2               | 0.85       | 2.01         | 2.662 (7)    | 133            |
| O7–H7A···O6               | 0.85       | 1.99         | 2.792 (10)   | 157            |
| O7–H7B···O7 <sup>ii</sup> | 0.85       | 2.14         | 2.919 (6)    | 153            |
| O6–H6D···O4               | 0.85       | 2.04         | 2.789 (6)    | 147            |
| O6–H6E···O5               | 0.85       | 2.10         | 2.870 (10)   | 150            |

**Symmetry codes:** (ii)  $y+1/4, -x+5/4, z+1/4$ ; (iii)  $y+1/4, -x+3/4, -z+3/4$ ; (iv)  $-y+5/4, x-1/4, z+3/4$ .



## Section 4. $^1\text{H}$ NMR Data From The Catalytic Reaction Results

(Table 2, Entry 1)

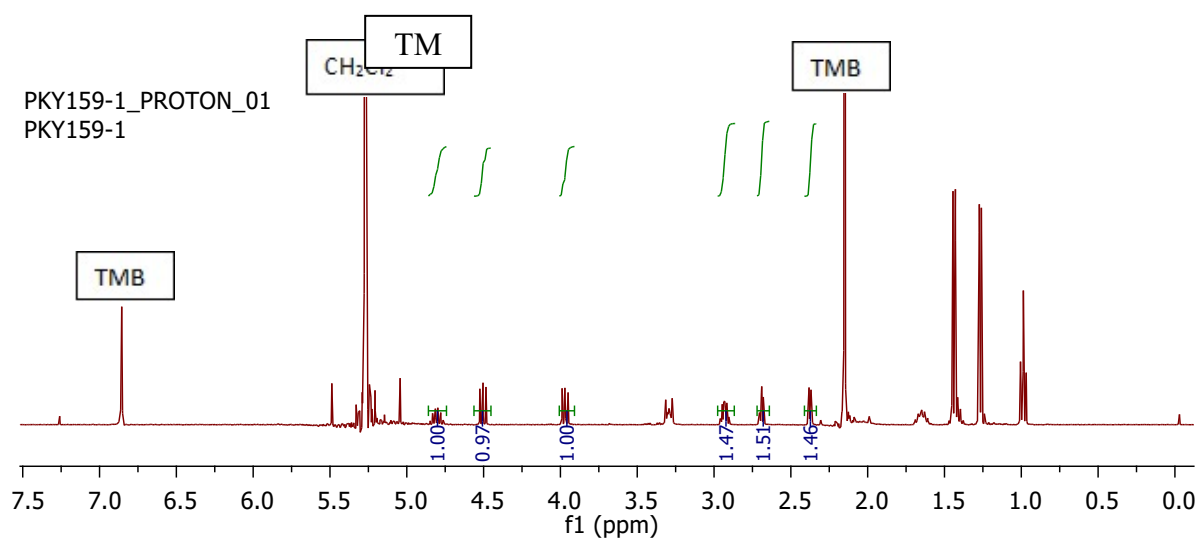

**Fig. S7.** The Catalytic Reaction Result of Entry 1

(Table 2, Entry 4)

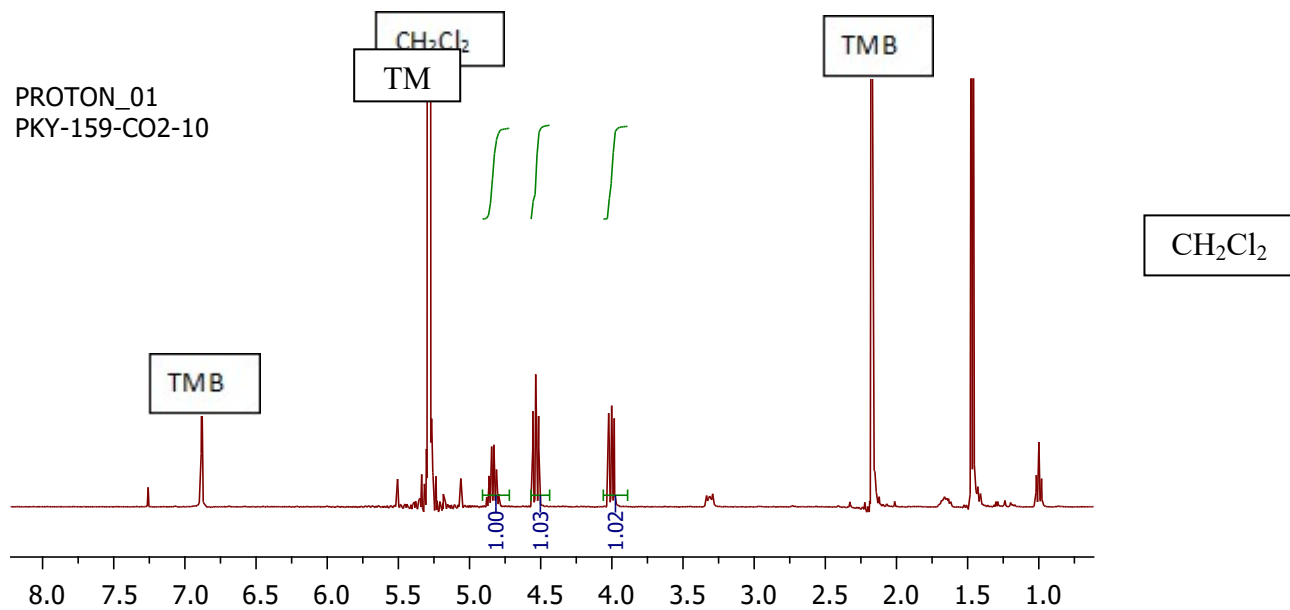

**Fig. S8.** The Catalytic Reaction Result of Entry 4

(Table 2, Entry 5)

PROTON\_01  
PKY-159-CO2-11-k

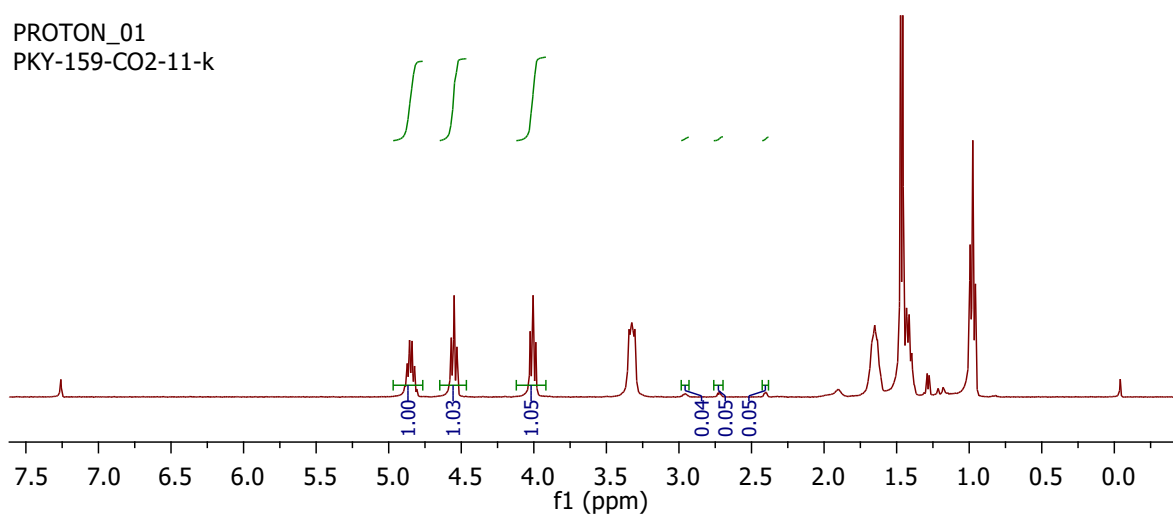

**Fig. S9.** The Catalytic Reaction Result of Entry 5

(Table 2, Entry 6)

PROTON\_01  
PKY-159-CO12-t

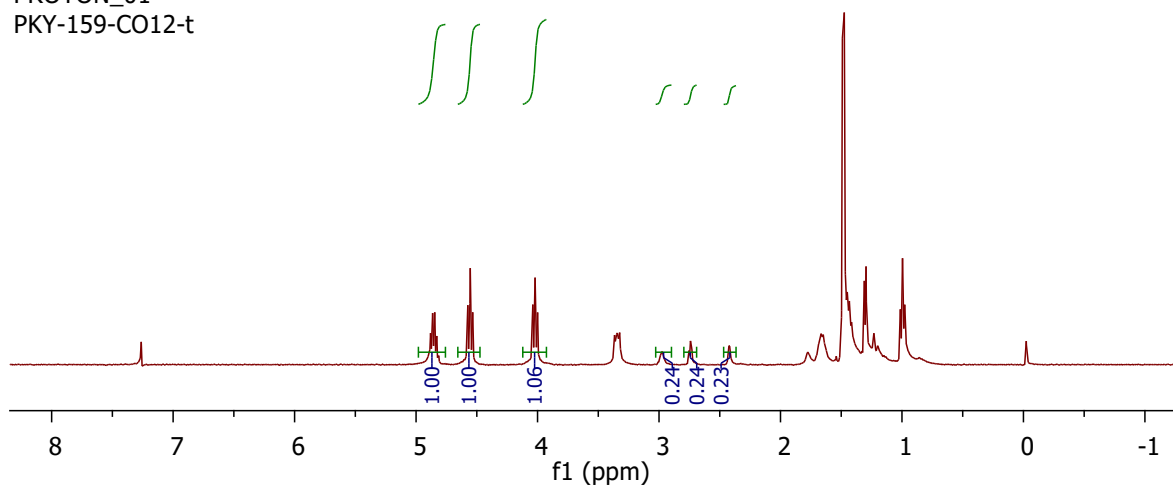

**Fig. S10.** The Catalytic Reaction Result of Entry 6

(Table 2, Entry 9)

PROTON\_02  
PKY-159-CO2-13

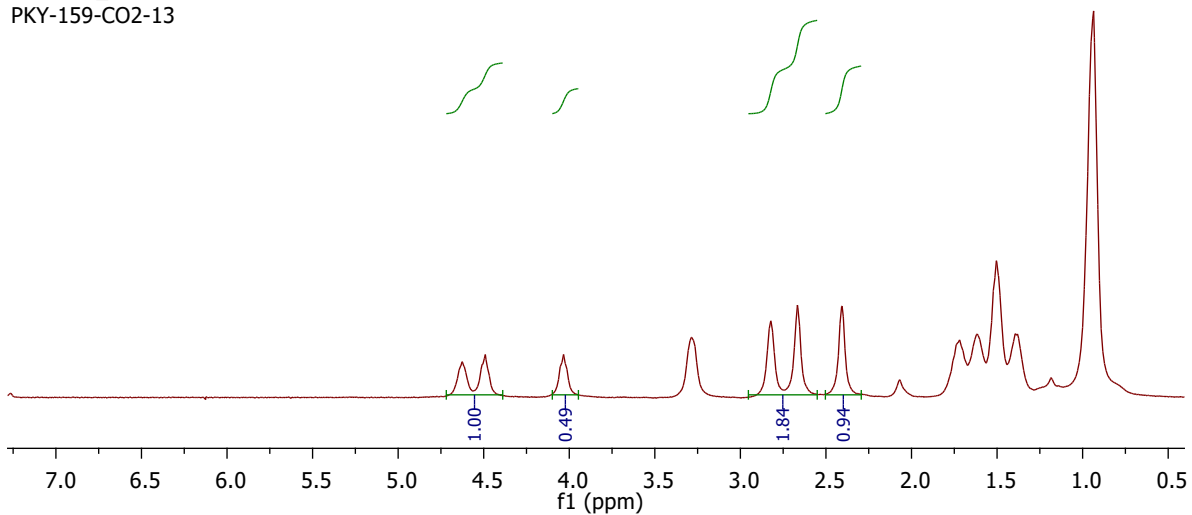

**Fig. S11.** The Catalytic Reaction Result of Entry 9

(Table 2, Entry 10)

PROTON\_01  
PKY-159-CO2-17

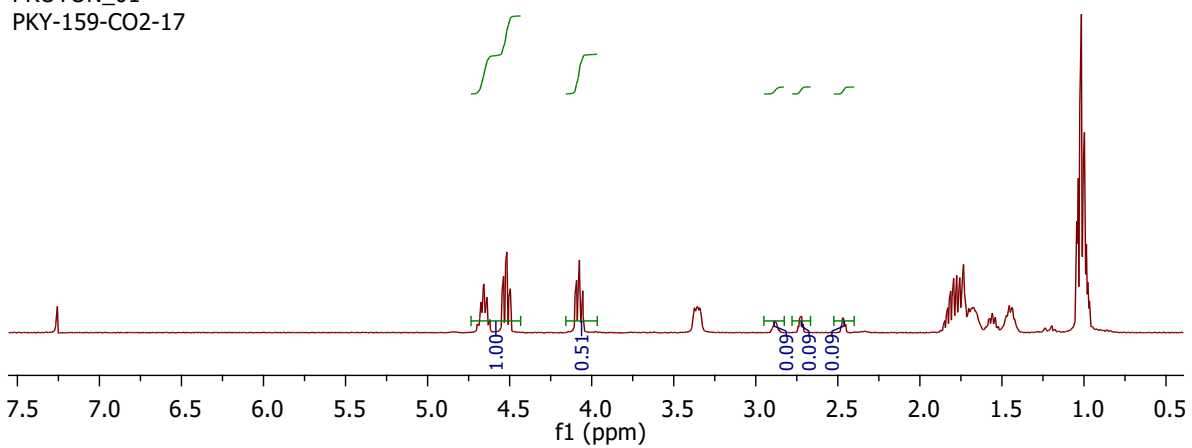

**Fig. S12.** The Catalytic Reaction Result of Entry 10

(Table 2, Entry 11)

PROTON\_01  
PKY-159-CO2-14

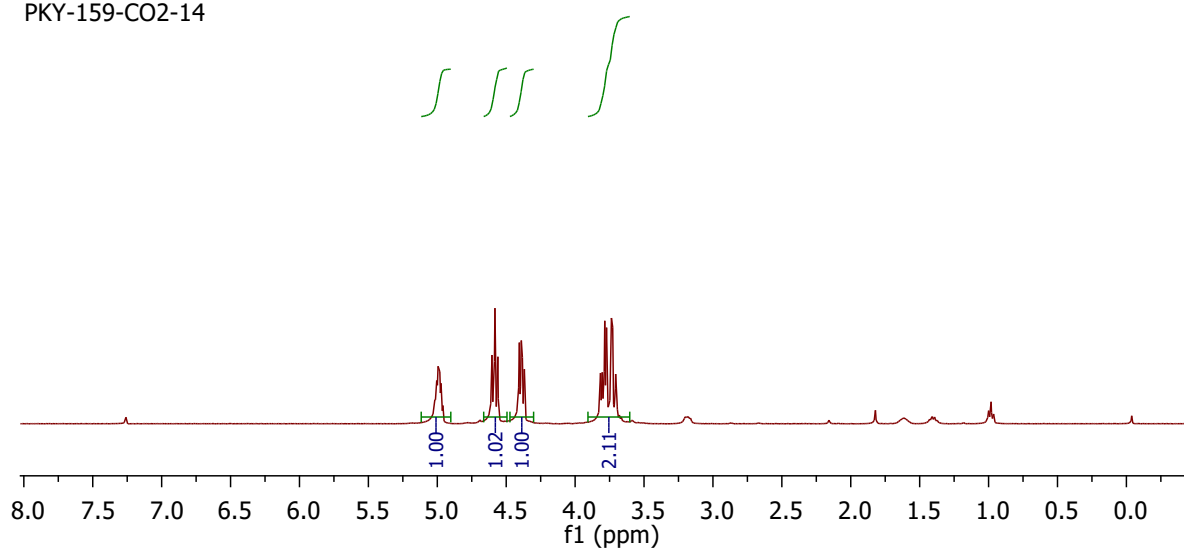

**Fig. S13.** The Catalytic Reaction Result of Entry 11

(Table 2, Entry 12)

PROTON\_01  
PKY-159-CO2-15

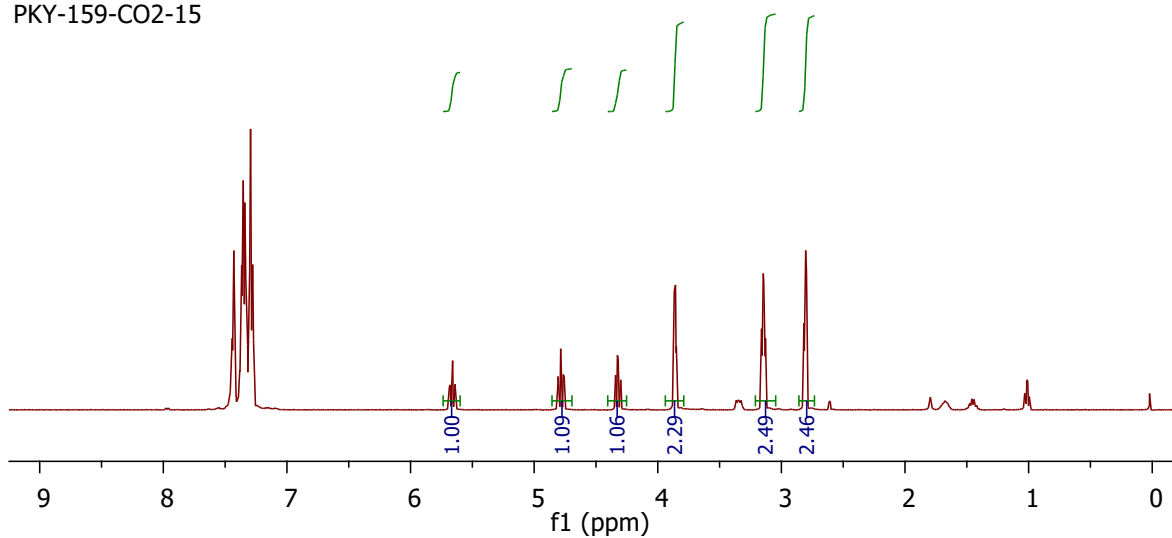

**Fig. S14.** The Catalytic Reaction Result of Entry 12

(Table 2, Entry 13)

PROTON\_02  
PKY-159-CO2-18

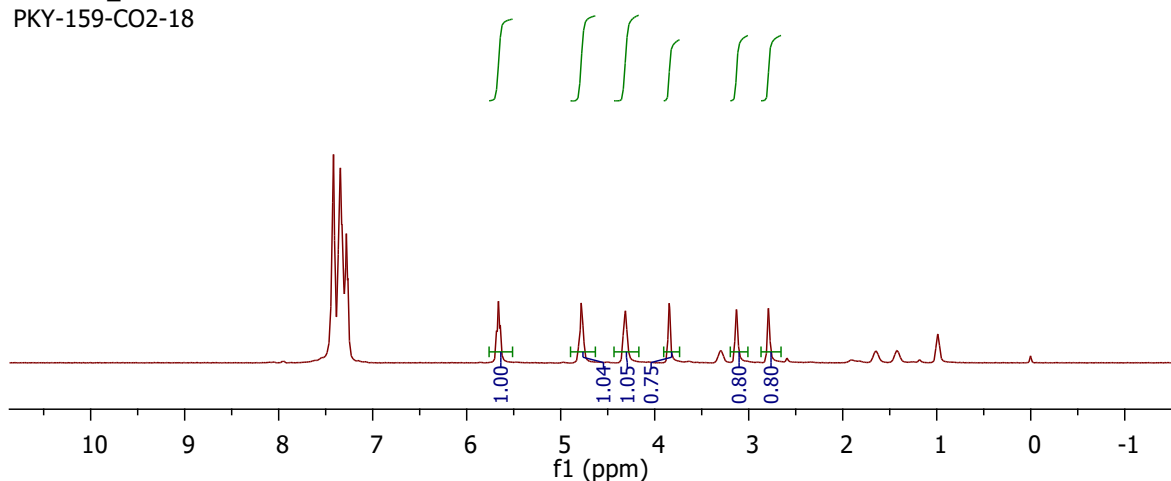

**Fig. S15.** The Catalytic Reaction Result of Entry 13

## Section 5. References

- [1] M. Kaya, S. Demir, M. Arıcı, M. Wriedt, O.Z. Yeşilel, Synthesis, characterization, and optical properties of four coordination polymers with 3,5-dicarboxy-1-(4-cyanobenzyl)pyridin-1-ium bromide, *Polyhedron*. 221 (2022) 115863. <https://doi.org/10.1016/J.POLY.2022.115863>.
- [2] E. Çiftçi, M. Arıcı, E. Demir, R. Demir-Cakan, M. Wriedt, O.Z. Yeşilel, Synthesis, characterization, optical and electrochemical performances of 3-fold interpenetrated Copper(II) coordination polymer with a flexible zwitterionic ligand, *J Solid State Chem.* 302 (2021) 122375. <https://doi.org/10.1016/J.JSSC.2021.122375>.
